# Supplementary material for: Effect of home-based newborn care on neonatal and infant mortality: a cluster randomised trial in India
Source: PubMed Central journal article supplement — BMJ Glob Health. 2020 Sep 24;5(9):e000680. doi: 10.1136/bmjgh-2017-000680 (PMC7517550; doi:10.1136/bmjgh-2017-000680), 2020-09-24
Supplement: bmjgh-2017-000680supp001.pdf [file bmjgh-2017-000680supp001.pdf]

**Web table 1: Package of interventions**

| <b>Interventions (preventive, curative, and promotive)</b>                                               | <b>Components</b>                                                                                                                                                                                                                                                                           | <b>Target groups</b>                                 |
|----------------------------------------------------------------------------------------------------------|---------------------------------------------------------------------------------------------------------------------------------------------------------------------------------------------------------------------------------------------------------------------------------------------|------------------------------------------------------|
| Health education, 3 antenatal visits and one visit during postnatal period                               | Care during pregnancy, preparation for safe delivery, lactation counseling/breast feeding, prevention of infection, rational newborn care practices, care of normal and low birth weight babies, early detection of illness and care seeking                                                | Mother, mother-in-law, other women and men in family |
| Care at birth                                                                                            | Cord care, eye care, resuscitation (tactile stimulation, bag and mask ventilation) if asphyxiated                                                                                                                                                                                           | Infants by home visiting                             |
| Care of normal newborn                                                                                   | Breast feeding, prevention of infection, thermal care, promotion of good newborn care practices, early detection of illness and care seeking, immunization and growth monitoring, injection vitamin K at birth                                                                              |                                                      |
| Care of low birth weight infants (<2500 grams)                                                           | Breast feeding, warmth by wrapping babies in blankets, prevention of infections, early detection of illness and care seeking, growth monitoring, injection vitamin K at birth                                                                                                               |                                                      |
| Identification and treatment of neonates and young infants with infections (sick infant <60 days of age) | Identification of sick infants using simple signs, treatment of local infections (umbilical sepsis, boils, conjunctivitis, diarrhoea), and sepsis (if referral refused), with two antibiotics (injection gentamicin+ oral cotrimoxazole syrup, thermal protection and other supportive care |                                                      |
| Community mobilization                                                                                   | Group health education                                                                                                                                                                                                                                                                      |                                                      |
