# Supplementary material for: Effect of home-based newborn care on neonatal and infant mortality: a cluster randomised trial in India
Source: PubMed Central journal article supplement — BMJ Glob Health. 2020 Sep 24;5(9):e000680. doi: 10.1136/bmjgh-2017-000680 (PMC7517550; doi:10.1136/bmjgh-2017-000680), 2020-09-24
Supplement: bmjgh-2017-000680supp002.pdf [file bmjgh-2017-000680supp002.pdf]

## Web table 2

## Midterm survey results

|                                                  | <i>Shishu Rakshak</i> (SR) arm | <i>Anganwadi worker</i> (AWW) arm | Control arm |
|--------------------------------------------------|--------------------------------|-----------------------------------|-------------|
| Livebirths                                       | 5930                           | 6422                              | 5613        |
| Neonatal deaths                                  | 262                            | 291                               | 221         |
| Neonatal mortality rate per 1000 live births     | 44.2                           | 45.3                              | 39.4        |
| Young infant deaths (0-60 days)                  | 282                            | 324                               | 260         |
| Young infant mortality rate per 1000 live births | 47.6                           | 50.5                              | 46.3        |
| Infant deaths (0-364 days)                       | 352                            | 391                               | 336         |
| Infant mortality rate per 1000 live births       | 59.4                           | 60.9                              | 59.9        |
