# Supplementary material for: Effect of home-based newborn care on neonatal and infant mortality: a cluster randomised trial in India
Source: PubMed Central journal article supplement — BMJ Glob Health. 2020 Sep 24;5(9):e000680. doi: 10.1136/bmjgh-2017-000680 (PMC7517550; doi:10.1136/bmjgh-2017-000680), 2020-09-24
Supplement: bmjgh-2017-000680supp006.pdf [file bmjgh-2017-000680supp006.pdf]

Web Table 3

## Mortality rates of infants in the three arms by place of birth (Post-hoc analysis)\*

|                                                      | Home births<br>N=6230                               |                                                          | Facility births<br>N=13139                          |                                                          |
|------------------------------------------------------|-----------------------------------------------------|----------------------------------------------------------|-----------------------------------------------------|----------------------------------------------------------|
|                                                      | <i>SR vs. control;<br/>adjusted OR<br/>(95% CI)</i> | <i>AWW vs.<br/>control;<br/>adjusted OR<br/>(95% CI)</i> | <i>SR vs. control;<br/>adjusted OR<br/>(95% CI)</i> | <i>AWW vs.<br/>control;<br/>adjusted OR<br/>(95% CI)</i> |
| Neonatal mortality rate (per 1000 live births)       | 0.81 (0.51, 1.26)                                   | 0.78 (0.51, 1.18)                                        | <b>0.72</b><br><b>(0.96)</b>                        | <b>(0.55,</b> 0.89 (0.66, 1.19)                          |
| Early neonatal mortality rate (per 1000 live births) | 0.76 (0.45, 1.29)                                   | 0.82 (0.51, 1.31)                                        | <b>0.64</b><br><b>(0.86)</b>                        | <b>(0.48,</b> 0.91 (0.66, 1.25)                          |
| Young infant mortality rate (per 1000 live births)   | 0.88 (0.57, 1.34)                                   | 0.89 (0.60, 1.34)                                        | <b>0.66</b><br><b>(0.88)</b>                        | <b>(0.50,</b> 0.85 (0.63, 1.13)                          |
| Infant mortality rate (per 1000 live births)         | 0.72 (0.49, 1.04)                                   | 0.84 (0.60, 1.18)                                        | <b>0.65</b><br><b>(0.82)</b>                        | <b>(0.51,</b> 0.80 (0.62, 1.04)                          |
| Stillbirth rate (per 1000 births)                    | 1.01 (0.60, 1.72)                                   | 1.22 (0.73, 2.03)                                        | 0.71<br>1.11)                                       | (0.46, 0.98 (0.70, 1.38)                                 |
| Perinatal mortality rate (per 1000 births)           | 0.86 (0.58, 1.29)                                   | 0.98 (0.68, 1.41)                                        | <b>0.67</b><br><b>(0.86)</b>                        | <b>(0.52,</b> 0.94 (0.73, 1.20)                          |

\*\*Adjusted for religion, caste, resident status, and education at the individual level, and distance to district hospital (<25 km), access to PHC or CHC, presence of private clinics, provision of Janani Suraksha Yojana (JSY) and ASHA in the village; cluster adjusted for villages
