# Supplementary figures and images for: Effect of home-based newborn care on neonatal and infant mortality: a cluster randomised trial in India
Source: PubMed Central journal article supplement — BMJ Glob Health. 2020 Sep 24;5(9):e000680. doi: 10.1136/bmjgh-2017-000680 (PMC7517550; doi:10.1136/bmjgh-2017-000680), 2020-09-24

**Web figure 1: Forest plot for effect of home based neonatal care on neonatal mortality rate**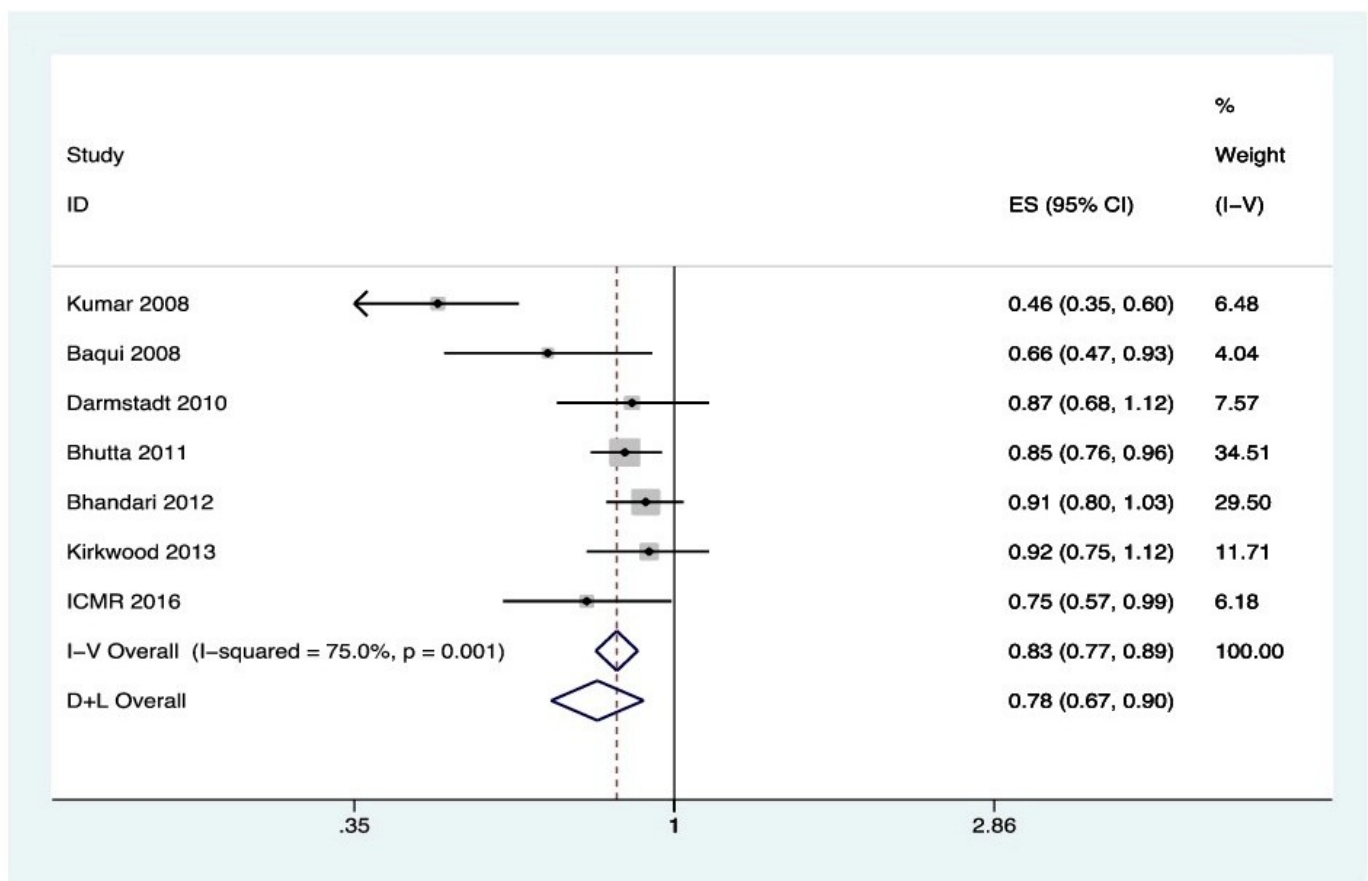

Supplement: bmjgh-2017-000680supp004.pdf [file bmjgh-2017-000680supp004.pdf]
